# Supplementary material for: Edible mushroom intake and risk of all-cause and cause-specific mortality: results from the Korean Genome and Epidemiology Study (KoGES) Cohort
Source: Royal Society of Chemistry journal article supplement (doi:10.1039/d3fo00996c), 2023-01-01

**Supplementary Figure 1.** Hazard ratios of mortality upon comparing the highest mushroom-consumption group after stratification by baseline age, smoking status, alcohol consumption, BMI, and chronic disease in men

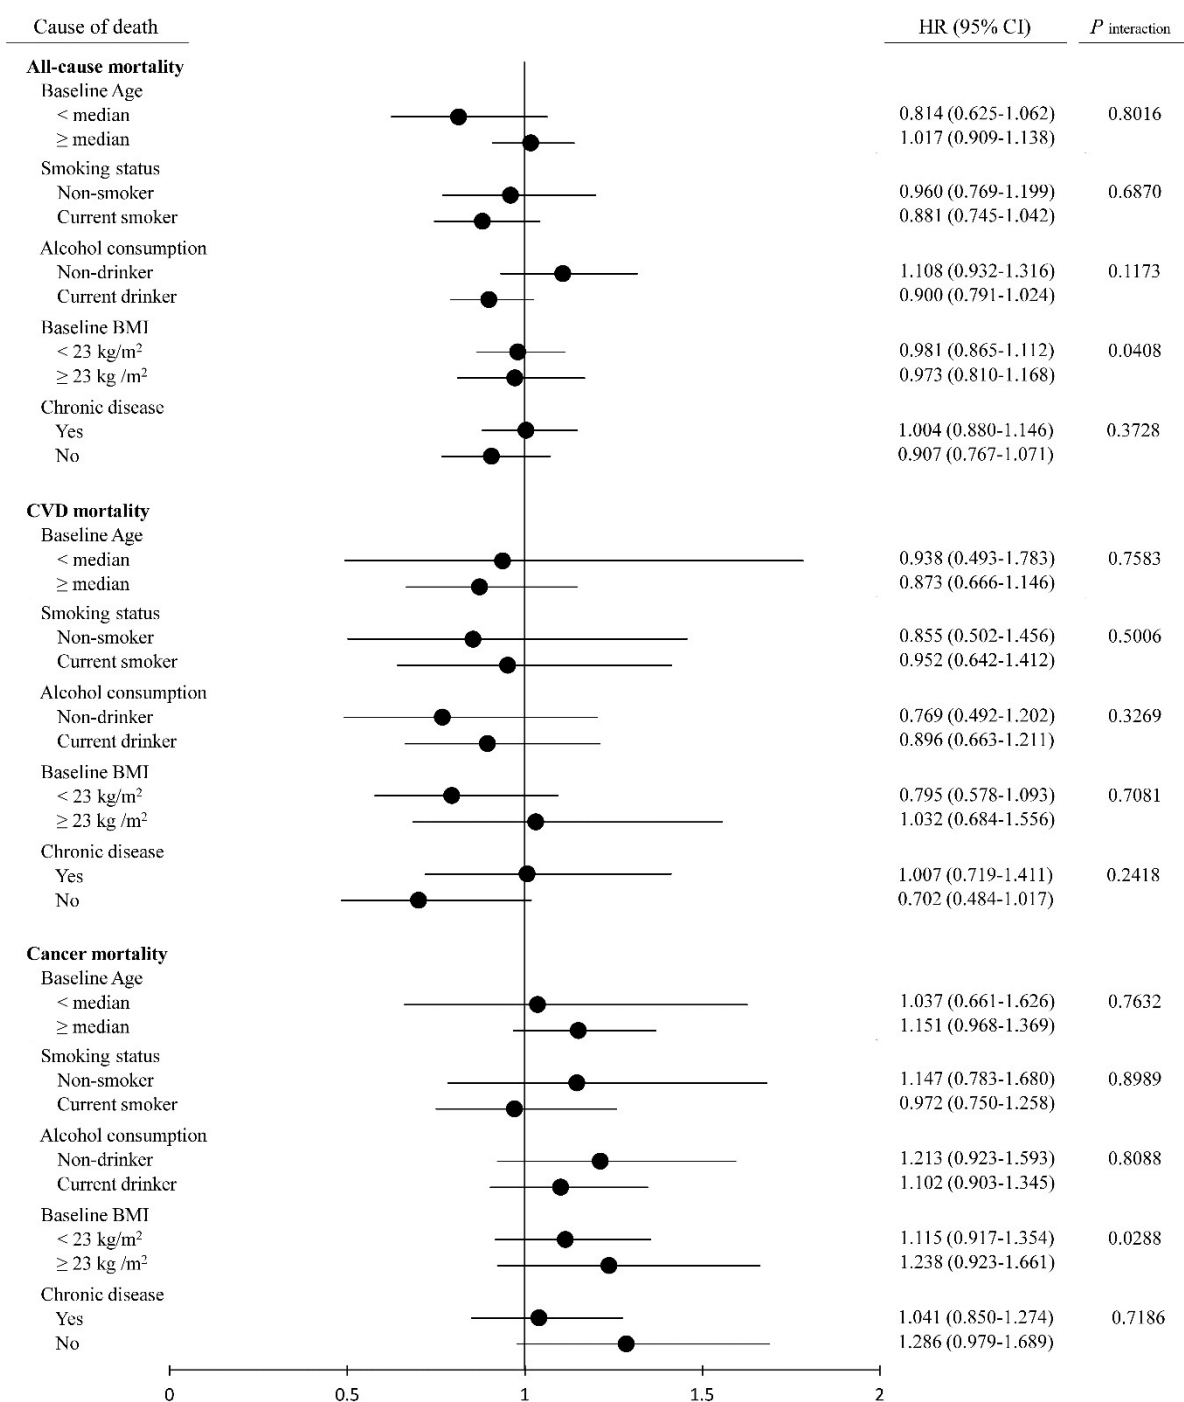

**Supplementary Figure 2.** Hazard ratios of mortality upon comparing the highest mushroom-consumption group after stratification by baseline age, smoking status, alcohol consumption, BMI, and chronic disease in women

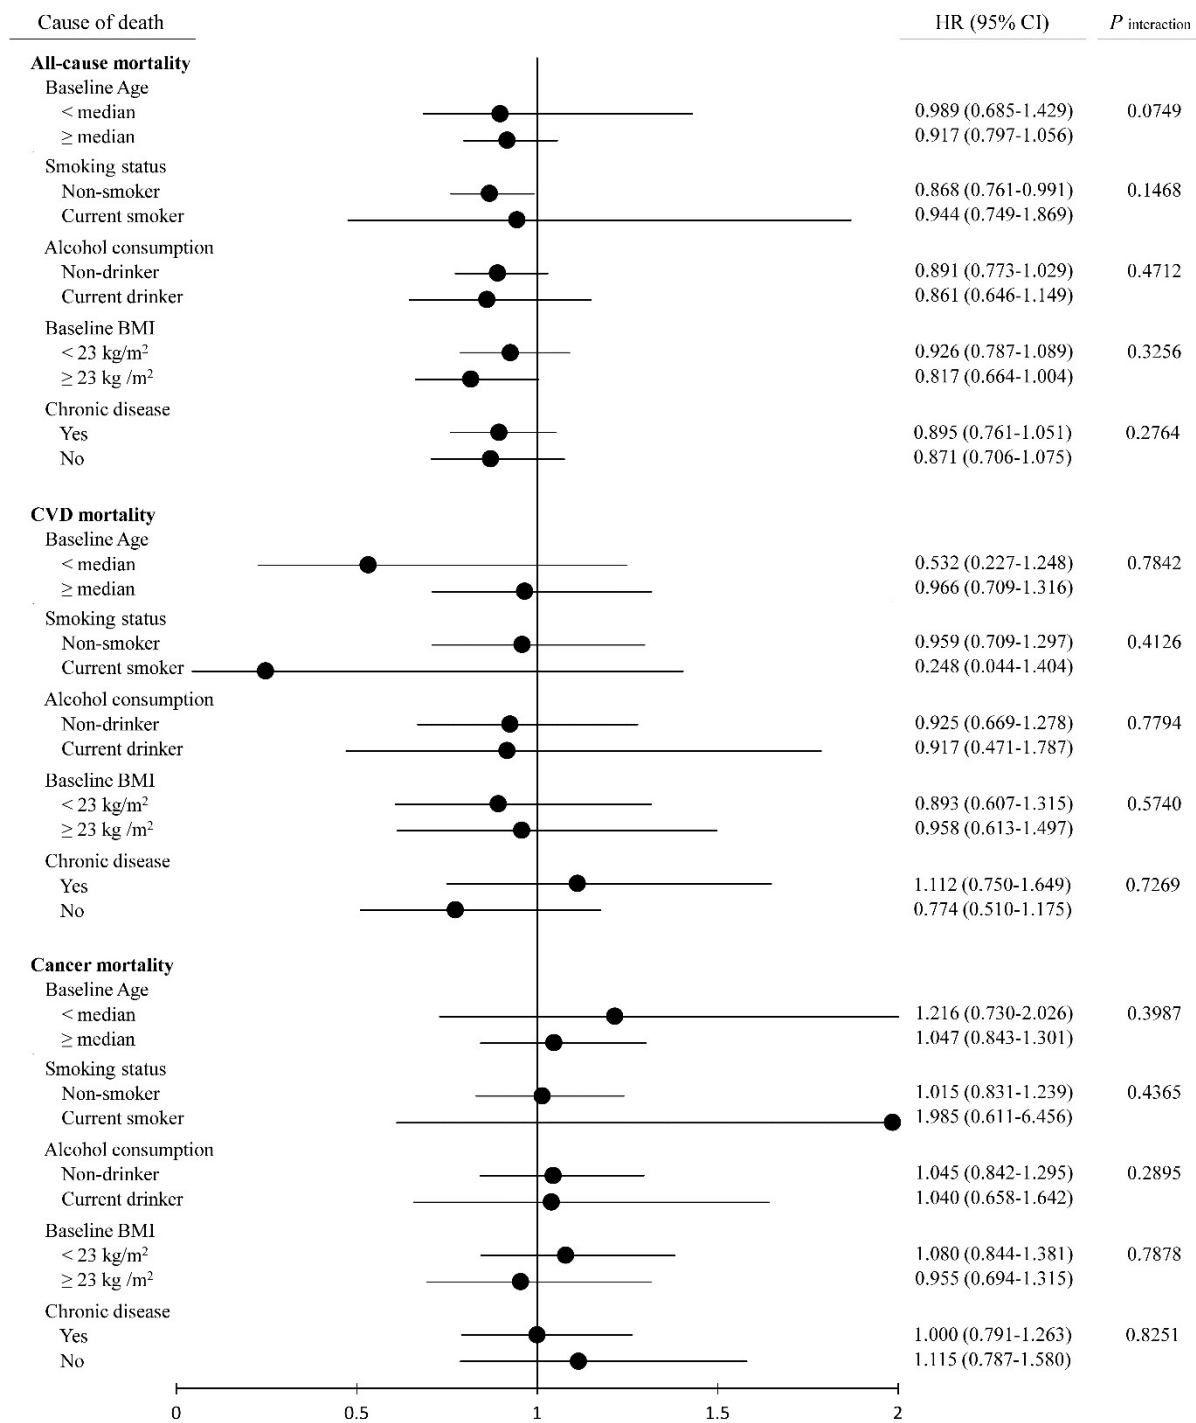

Supplement: d3fo00996c1.pdf [file d3fo00996c1.pdf]
